# Supplementary material for: A Japanese Study Assessing Glycemic Control with Use of IDegAsp Co-formulation in Patients with Type 2 Diabetes in Clinical Practice: The JAGUAR Study
Source: Springer Nature journal article supplement (doi:10.1007/s12325-021-01623-y), 2021-02-09
Supplement: MOESM1 [file 18849040]

## **Supplementary Material for:**

### **A Japanese Study Assessing Glycemic Control with use of IDegAsp**

### **Co-formulation in Patients with Type 2 Diabetes in Clinical Practice:**

#### **the JAGUAR study**

Shizuka Kaneko<sup>1</sup>, João Diogo da Rocha Fernandes<sup>2</sup>, Yuiko Yamamoto<sup>3</sup>, Jakob Langer<sup>3</sup>, Mads Faurby<sup>2</sup>

<sup>1</sup>Division of Diabetes/Endocrinology/Lifestyle-related Disease, Takatsuki Red Cross Hospital,

Takatsuki, Japan; <sup>2</sup>Novo Nordisk A/S, Vandtårnsvej 108, 2860 Søborg, Denmark; <sup>3</sup>Novo Nordisk

Pharma Ltd, Tokyo, Japan

Hypoglycemic events were taken from the administrative database and identified by the following billable International Classification of Diseases (ICD), tenth edition, clinical modification (CM) (ICD-10-CM) codes (ICD.Codes):

- E16.0: a diagnosis of drug-induced hypoglycemia without coma
- E16.1: a diagnosis of other hypoglycemia
- E162: a diagnosis of hypoglycemia, unspecified

A diagnosis of type 2 diabetes was identified using ICD-10-CM code E11 subtypes (ICD.Codes):

- E11.0: type 2 diabetes mellitus with hyperosmolarity
- E11.2: type 2 diabetes mellitus with kidney complications
- E11.3: type 2 diabetes mellitus with ophthalmic complications
- E11.4: type 2 diabetes mellitus with neurological complications
- E11.5: type 2 diabetes mellitus with circulatory complications

- E11.6: type 2 diabetes mellitus with other specified complications
- E11.8: type 2 diabetes mellitus with unspecified complications
- E11.9: type 2 diabetes mellitus without complications

**Table S1** Patient demographics and baseline clinical characteristics for patients according to their previous insulin therapy

|                                                           | <b>Pre-mixed<br/>insulin (n=4847)</b> | <b>Basal–bolus<br/>insulin (n=4400)</b> | <b>Basal insulin<br/>(n=1551)</b> | <b>Total population<br/>(n=10,798)</b> |
|-----------------------------------------------------------|---------------------------------------|-----------------------------------------|-----------------------------------|----------------------------------------|
| Age, mean $\pm$ SD (years)                                | 70.7 $\pm$ 10.6                       | 71.3 $\pm$ 11.7                         | 66.7 $\pm$ 12.4                   | 70.4 $\pm$ 11.4                        |
| Female, n (%)                                             | 2086 (43.0)                           | 1853 (42.1)                             | 686 (44.2)                        | 4625 (42.8)                            |
| Inpatient setting, n (%)                                  | 2151 (44.4)                           | 3553 (80.8)                             | 504 (32.5)                        | 6208 (57.5)                            |
| BMI, mean $\pm$ SD (kg/m <sup>2</sup> ) <sup>a</sup>      | 23.7 $\pm$ 4.5                        | 23.2 $\pm$ 4.6                          | 24.4 $\pm$ 4.5                    | 23.4 $\pm$ 4.6                         |
| Duration of type 2 diabetes,<br>mean $\pm$ SD (years)     | 10.9 $\pm$ 8.5                        | 6.4 $\pm$ 7.7                           | 9.5 $\pm$ 7.7                     | 8.9 $\pm$ 8.3                          |
| HbA <sub>1c</sub> , mean $\pm$ SD (%) <sup>b</sup>        | 7.9 $\pm$ 1.4                         | 8.7 $\pm$ 2.2                           | 8.7 $\pm$ 1.5                     | 8.4 $\pm$ 1.9                          |
| History of hypertension, n (%)                            | 3669 (75.7)                           | 3149 (71.6)                             | 1100 (70.9)                       | 7918 (73.3)                            |
| History of dyslipidemia, n (%)                            | 3397 (70.1)                           | 2592 (58.9)                             | 1171 (75.5)                       | 7160 (66.3)                            |
| History of nephropathy, n (%)                             | 2114 (43.6)                           | 1566 (35.6)                             | 763 (49.2)                        | 4443 (41.1)                            |
| History of retinopathy, n (%)                             | 2049 (42.3)                           | 1562 (35.5)                             | 685 (44.2)                        | 4296 (39.8)                            |
| History of neuropathy, n (%)                              | 1264 (26.1)                           | 1020 (23.2)                             | 448 (28.9)                        | 2732 (25.3)                            |
| Total number of concomitant<br>medications, mean $\pm$ SD | 12.2 $\pm$ 8.4                        | 17.9 $\pm$ 11.1                         | 10.6 $\pm$ 6.1                    | 14.3 $\pm$ 9.8                         |

<sup>a</sup>Baseline BMI measurements: total population (n=4928); pre-mixed insulin (n=1486); basal–bolus insulin (n=3142); basal insulin (n=300). <sup>b</sup>Baseline HbA<sub>1c</sub> measurements: total population (n=913); pre-mixed insulin (n=370); basal–bolus insulin (n=443); basal insulin (n=100).

BMI, body mass index; SD, standard deviation.

**Table S2** Patient demographics and baseline clinical characteristics for patients with an HbA<sub>1c</sub> value at baseline

|                                                   | <b>HbA<sub>1c</sub> recorded at<br/>baseline<sup>a</sup> (n=913)</b> | <b>No HbA<sub>1c</sub> recorded<br/>at baseline (n=9885)</b> | <b>Total population<br/>(n=10,798)</b> |
|---------------------------------------------------|----------------------------------------------------------------------|--------------------------------------------------------------|----------------------------------------|
| Age, mean ± SD (years)                            | 70.4 ± 11.8                                                          | 70.4 ± 11.4                                                  | 70.4 ± 11.4                            |
| Female, n (%)                                     | 398 (43.6)                                                           | 4227 (42.8)                                                  | 4625 (42.8)                            |
| Inpatient setting, n (%)                          | 589 (64.5)                                                           | 5619 (56.8)                                                  | 6208 (57.5)                            |
| BMI, mean ± SD (kg/m <sup>2</sup> ) <sup>b</sup>  | 23.8 ± 4.3                                                           | 23.4 ± 4.6                                                   | 23.4 ± 4.6                             |
| Duration of type 2 diabetes,<br>mean ± SD (years) | 9.3 ± 9.2                                                            | 8.9 ± 8.3                                                    | 8.9 ± 8.3                              |
| History of hypertension, n (%)                    | 688 (75.4)                                                           | 7230 (73.1)                                                  | 7918 (73.3)                            |
| History of dyslipidemia, n (%)                    | 619 (67.8)                                                           | 6541 (66.2)                                                  | 7160 (66.3)                            |
| History of nephropathy, n (%)                     | 449 (49.2)                                                           | 3994 (40.4)                                                  | 4443 (41.1)                            |
| History of retinopathy, n (%)                     | 385 (42.2)                                                           | 3911 (39.6)                                                  | 4296 (39.8)                            |
| History of neuropathy, n (%)                      | 271 (29.7)                                                           | 2461 (24.9)                                                  | 2732 (25.3)                            |
| Insulin therapy, n (%)                            |                                                                      |                                                              |                                        |
| Pre-mixed insulin                                 | 370 (40.5)                                                           | 4477 (45.3)                                                  | 4847 (44.9)                            |
| Basal–bolus insulin                               | 443 (48.5)                                                           | 3957 (40.0)                                                  | 4400 (40.7)                            |
| Basal insulin                                     | 100 (11.0)                                                           | 1451 (14.7)                                                  | 1551 (14.4)                            |

<sup>a</sup>Mean  $\pm$  SD baseline HbA<sub>1c</sub> was 8.4%  $\pm$  1.9; <sup>‡</sup>Baseline BMI measurements: total population (n=4928); patients with HbA<sub>1c</sub> recorded at baseline (n=484); patients without HbA<sub>1c</sub> recorded at baseline (n=4444).

BMI, body mass index; SD, standard deviation.

**Table S3** HbA<sub>1c</sub> (%) at 12 months by baseline insulin therapy (descriptive data).

|                     | <b>Pre-mixed<br/>insulin (n=200)</b> | <b>Basal–bolus<br/>insulin (n=184)</b> | <b>Basal insulin<br/>(n=58)</b> | <b>Total population<br/>(n=442)</b> |
|---------------------|--------------------------------------|----------------------------------------|---------------------------------|-------------------------------------|
| Mean $\pm$ SD       | 7.5 $\pm$ 1.2                        | 7.5 $\pm$ 1.2                          | 8.0 $\pm$ 1.1                   | 7.6 $\pm$ 1.2                       |
| Median              | 7.4                                  | 7.3                                    | 7.9                             | 7.4                                 |
| Minimum;<br>maximum | 5.4; 15.5                            | 4.5; 12.3                              | 5.5; 11.7                       | 4.5; 15.5                           |

SD, standard deviation.

**Table S4** Rates of hypoglycemia at 12 months by baseline insulin therapy (descriptive data).

|                     | <b>N</b> | <b>Number of events after IDegAsp treatment</b> | <b>Rate after IDegAsp treatment [events per participant-year]</b> | <b>Number of events at baseline</b> | <b>Rate at baseline [events per participant-year]</b> |
|---------------------|----------|-------------------------------------------------|-------------------------------------------------------------------|-------------------------------------|-------------------------------------------------------|
| Total               | 10,798   | 659                                             | 0.09                                                              | 1005                                | 0.10                                                  |
| Pre-mixed insulin   | 4847     | 205                                             | 0.06                                                              | 412                                 | 0.09                                                  |
| Basal–bolus insulin | 4400     | 412                                             | 0.15                                                              | 510                                 | 0.15                                                  |
| Basal insulin       | 1551     | 42                                              | 0.04                                                              | 83                                  | 0.06                                                  |

IDegAsp, insulin degludec/insulin aspart

**Table S5** Total number of concomitant medications at 12 months by baseline insulin therapy.

|           | <b>Pre-mixed insulin (n=4847)</b> | <b>Basal–bolus insulin (n=4400)</b> | <b>Basal insulin (n=1551)</b> | <b>Total population (n=10,798)</b> |
|-----------|-----------------------------------|-------------------------------------|-------------------------------|------------------------------------|
| Mean ± SD | 12.8 ± 8.9                        | 17.3 ± 11.2                         | 11.2 ± 7.0                    | 14.4 ± 10.0                        |

SD, standard deviation.

**Figure S1** Selection of patients from the MDV database for inclusion in the analysis

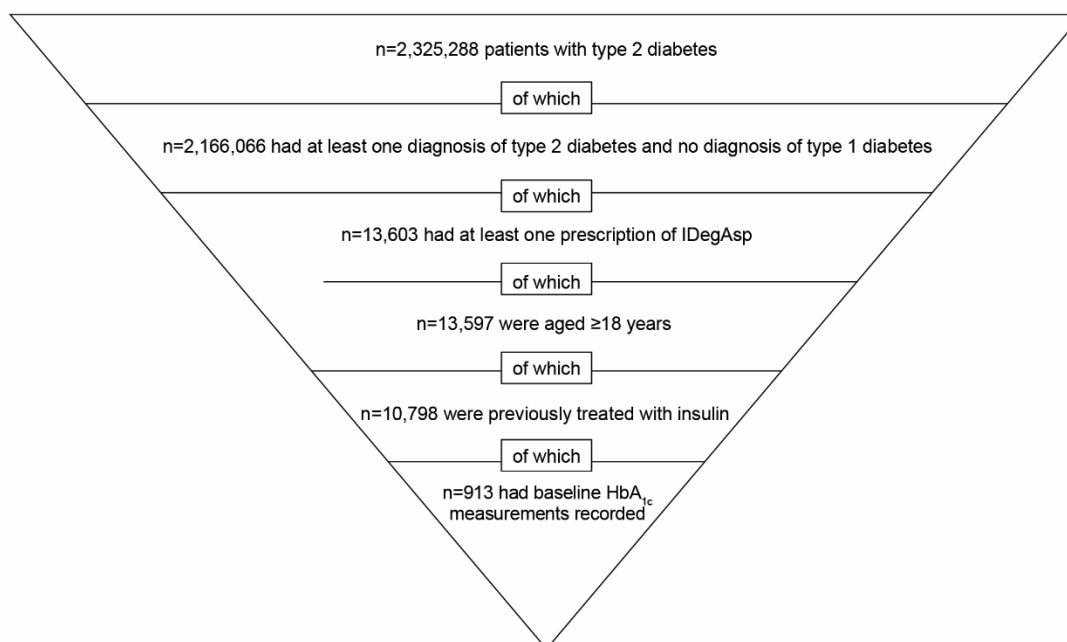

IDegAsp, insulin degludec/insulin aspart; MDV, Medical Data Vision.

**Figure S2** Proportion of patients receiving at least one concomitant medication, before IDegAsp treatment and 12 months after treatment.

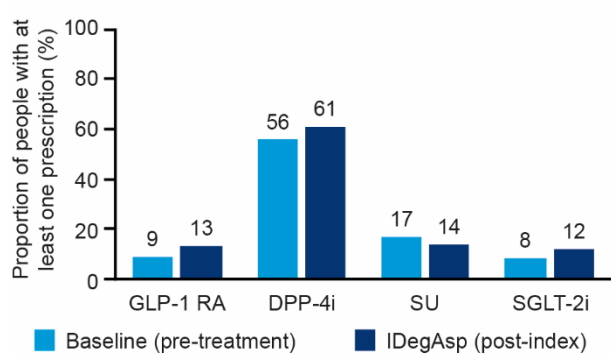

DPP-4i, dipeptidyl peptidase 4 inhibitor; GLP-1 RA, glucagon-like peptide-1 receptor agonist;

IDegAsp, insulin degludec/insulin aspart; SGLT-2i, sodium–glucose co-transporter 2 inhibitor; SU, sulfonylurea.

## References for Supplementary Material:

- ICD.Codes. (2019, December). ICD-10-CM Code E11.0. Retrieved from <https://icd.codes/icd10cm/E11>
- ICD.Codes. (2019, December). ICD-10-CM Code E16.0. Retrieved from <https://icd.codes/icd10cm/E160>
